# Supplementary material for: Diversity of human small intestinalStreptococcusandVeillonellapopulations
Source: Oxford University Press journal article supplement (doi:10.1111/1574-6941.12127), 2013-04-05
Supplement: fem12127-sup-0005-TableS1-S2.docx [file fem12127-sup-0005-TableS1-S2.docx]

Table S1: API strip scores for MS bacterial isolates

| Classification (genus) | Phylotypea | Lineagea  (Total number of isolates) | Isolateb,c | CONTROL | Glycerol | Erythritol | D-Arabinose | L-Arabinose | D-Ribose | D-Xylose | L-Xylose | D-Adonitol | Methyl-βD-Xylopyranoside | D-Galactose | D-Glucose | D-Fructose | D-Mannose | L-Sorbose | L-Rhamnose | Dulcitol | Inositol | D-Mannitol | D-Sortbitol | Methyl-αD-Mannopyranoside | Methyl-αD-glucopyranoside | N-AcetylGlucosamine | Amygdalin | Arbutin | Esculin ferric citrate | Salicin | D-Cellobiose | D-Maltose | D-Lactose (bovine origin) | D-Melibiose | D-Saccharose (sucrose) | D-Trehalose | Inulin | D-MeLeZitose | D-Raffinose | AmiDon (starch) | Glycogen | Xylitol | Gentiobiose | D-Turanose | D-Lyxose | D-Tagatose | D-Fucose | L-Fucose | D-Arabitol | L-arabitol | Potassium GlucoNaTe | Potassium 2-KetoGluconate | Potassium 5-KetoGluconate |
| --- | --- | --- | --- | --- | --- | --- | --- | --- | --- | --- | --- | --- | --- | --- | --- | --- | --- | --- | --- | --- | --- | --- | --- | --- | --- | --- | --- | --- | --- | --- | --- | --- | --- | --- | --- | --- | --- | --- | --- | --- | --- | --- | --- | --- | --- | --- | --- | --- | --- | --- | --- | --- | --- |
| 0 | 1 | 2 | 3 | 4 | 5 | 6 | 7 | 8 | 9 | 10 | 11 | 12 | 13 | 14 | 15 | 16 | 17 | 18 | 19 | 20 | 21 | 22 | 23 | 24 | 25 | 26 | 27 | 28 | 29 | 30 | 31 | 32 | 33 | 34 | 35 | 36 | 37 | 38 | 39 | 40 | 41 | 42 | 43 | 44 | 45 | 46 | 47 | 48 | 49 |
| *Streptococcus* | 1 | 1 (3) | 1 |  |  |  |  |  |  |  |  |  |  |  |  |  | d |  |  |  |  |  |  |  |  | d |  |  |  |  |  |  |  | d |  |  |  |  |  |  |  |  |  |  |  |  |  |  |  |  |  |  |  |
| 2 |  |  |  |  |  |  |  |  |  |  | w | w | w | w |  |  |  |  |  |  |  |  |  |  |  |  |  |  | w | w |  | w |  |  |  |  |  |  |  |  |  |  |  |  |  |  |  |  |  |  |
| 2 | 2 (17) | 1 |  |  |  |  | w |  |  |  |  |  |  |  |  |  |  |  |  |  |  |  |  |  |  |  |  |  |  |  |  |  |  |  |  | d |  |  |  |  |  |  |  |  |  |  |  |  |  |  |  |  |
| 2 |  |  |  |  | w |  |  |  |  |  |  |  |  |  |  |  |  |  |  |  |  |  |  |  |  |  |  |  |  |  |  |  |  |  |  |  |  |  |  |  |  |  |  |  |  |  |  |  |  |  |
| 3 | 4d (1) | 1 |  |  |  |  |  |  |  |  |  |  |  |  |  | d |  |  |  |  |  |  |  |  | d |  |  |  |  | w |  |  |  |  |  |  |  |  |  |  |  |  |  |  |  |  |  |  |  |  |  |  |
| 5 (1) | 1 |  |  |  |  |  |  |  |  |  |  |  |  |  | d |  |  |  |  |  |  |  |  |  |  |  |  |  |  |  |  | w |  |  |  |  | w |  |  |  |  |  |  |  |  |  |  |  |  |  |  |
| 6 (8) | 1 |  |  |  |  |  |  |  |  |  |  | w | w | w | d |  |  |  |  |  |  |  |  |  |  |  |  |  |  |  |  |  |  |  |  |  | w |  |  |  |  |  |  |  |  |  |  |  |  |  |  |
| 2 |  |  |  |  |  |  |  |  |  |  | w | w | w | w |  |  |  |  |  |  |  |  |  |  |  |  |  |  | w | w |  | w |  |  |  |  |  |  |  |  |  |  |  |  |  |  |  |  |  |  |
| 7 (66) | 1 |  |  |  |  |  |  |  |  |  |  |  |  |  |  |  |  |  |  |  |  |  |  | d |  |  |  |  | w |  |  |  |  |  |  |  |  |  |  |  |  |  |  |  |  |  |  |  |  |  |  |
| 2 |  |  |  |  |  |  |  |  |  |  | w |  |  | w |  |  |  |  |  |  |  |  |  |  |  |  | w |  |  | w |  |  |  |  |  |  |  |  |  |  |  |  |  |  |  |  |  |  |  |  |

Black: positive reaction; Grey w: weak reaction, d: variable reaction between duplicate tests of the same isolate; White: negative reaction; a: The numbering of the phylotypes and lineages are based on the order of groupings in table 3 and (clockwise) groupings in figure S3; b: To determine if fermentation patterns were consisted for isolates belonging to the same genomic lineage, two isolates from most of genomic lineages were tested, if possible; c: Number 1 isolates were tested in duplicate; d: AFLP analysis unlike rep-PCR genomic fingerprinting identified a single *Streptococcus* isolate as a separate genomic lineage. According to rep-PCR genomic fingerprinting this isolate belongs to *Streptococcus* lineage 7.

Table S2: Characteristics of isolates from ileostoma effluent

| **Isolate** | **Sampling time point** | **Genus-level identifications of near full-length 16S rRNA sequences***** | **Genus-level identifications of partial 16S rRNA sequences***** | **Species-level identifications of near full-length 16S rRNA sequences***** | **Phylotype*** | **Grouping based on AFLP** | **Grouping based on Rep-PCR genomic fingerprinting** | **Final lineage grouping** |
| --- | --- | --- | --- | --- | --- | --- | --- | --- |
| 2010_Ileo_MS_VIc | 0 | *Streptococcus* |  | Streptococcus mitis group | 1 | 6 | 1 | 1 |
| 2010_Ileo_MS_VId | 0 | *Streptococcus* |  | Streptococcus mitis group | 1 | 6 | 1 | 1 |
| 2010_Ileo_MS_VIIb | 0 | *Streptococcus* |  | Streptococcus mitis group | 1 | 6 | 1 | 1 |
| 2010_Ileo_MS_Va | 0 | *Streptococcus* |  | Streptococcus bovis group | 2 | 5 | 8 | 2 |
| 2010_Ileo_MS_Vc | 0 | *Streptococcus* |  | Streptococcus bovis group | 2 | 5 | 8 | 2 |
| 2010_Ileo_MS_Vd | 0 | *Streptococcus* |  | Streptococcus bovis group | 2 | 5 | 8 | 2 |
| 2010_Ileo_MS_Vf | 0 | *Streptococcus* |  | Streptococcus bovis group | 2 | 5 | 8 | 2 |
| 2010_Ileo_MS_VIe | 0 | *Streptococcus* |  | Streptococcus bovis group | 2 | 5 | 8 | 2 |
| 2010_Ileo_MS_VIf | 0 | *Streptococcus* |  | Streptococcus bovis group | 2 | 5 | 8 | 2 |
| 2010_Ileo_MS_VIIa | 0 | *Streptococcus* |  | Streptococcus bovis group | 2 | 5 | 8 | 2 |
| 2010_Ileo_MS_VIIc | 0 | *Streptococcus* |  | Streptococcus bovis group | 2 | 5 | 8 | 2 |
| 2010_Ileo_MS_VIIe | 0 | *Streptococcus* |  | Streptococcus bovis group | 2 | 5 | 8 | 2 |
| 2010_Ileo_MS_XVb | 0 | *Streptococcus* |  | Streptococcus bovis group | 2 | 5 | 8 | 2 |
| 2010_Ileo_MS_XVe | 0 | *Streptococcus* |  | Streptococcus bovis group | 2 | 5 | 8 | 2 |
| 2010_Ileo_MS_XVf | 0 | *Streptococcus* |  | Streptococcus bovis group | 2 | 5 | 8 | 2 |
| 2010_Ileo_MS_XVIIIa | 0 | *Streptococcus* |  | Streptococcus bovis group | 2 | 5 | 8 | 2 |
| 2011_Ileo_MS_B11 | 1 | *Streptococcus* |  |  |  | ND | 8 | 2 |
| 2011_Ileo_MS_D2 | 1 | *Streptococcus* |  | Streptococcus bovis group | 2 | ND | 8 | 2 |
| 2011_Ileo_MS_E2 | 1 | *Streptococcus* |  |  |  | ND | 8 | 2 |
| 2011_Ileo_MS_G4 | 1 | *Streptococcus* |  |  |  | ND | 8 | 2 |
| 2011_Ileo_MS_D1 | 1 | *Streptococcus* |  | Streptococcus bovis group | 2 | ND | 7 | 3 |
| 2011_Ileo_MS_F1 | 1 | *Streptococcus* |  | Streptococcus bovis group | 2 | ND | 7 | 3 |
| 2011_Ileo_MS_H1 | 1 | *Streptococcus* |  | Streptococcus bovis group | 2 | ND | 7 | 3 |
| 2011_Ileo_MS_A10 | 1 | *Streptococcus* |  | Streptococcus bovis group | 2 | ND | 7 | 3 |
| 2011_Ileo_MS_B10 | 1 | *Streptococcus* |  | Streptococcus bovis group | 2 | ND | 7 | 3 |
| 2011_Ileo_MS_C10 | 1 |  | *Streptococcus* |  |  | ND | 7 | 3 |
| 2011_Ileo_MS_D10 | 1 | *Streptococcus* |  | Streptococcus bovis group | 2 | ND | 7 | 3 |
| 2011_Ileo_MS_E10 | 1 | *Streptococcus* |  | Streptococcus bovis group | 2 | ND | 7 | 3 |
| 2011_Ileo_MS_F10 | 1 | *Streptococcus* |  | Streptococcus bovis group | 2 | ND | 7 | 3 |
| 2011_Ileo_MS_G10 | 1 | *Streptococcus* |  | Streptococcus bovis group | 2 | ND | 7 | 3 |
| 2011_Ileo_MS_H10 | 1 |  | *Streptococcus* |  |  | ND | 7 | 3 |
| 2011_Ileo_MS_A11 | 1 | *Streptococcus* |  | Streptococcus bovis group | 2 | ND | 7 | 3 |
| 2011_Ileo_MS_D11 | 1 | *Streptococcus* |  | Streptococcus bovis group | 2 | ND | 7 | 3 |
| 2011_Ileo_MS_E11 | 1 | *Streptococcus* |  | Streptococcus bovis group | 2 | ND | 7 | 3 |
| 2011_Ileo_MS_F11 | 1 | *Streptococcus* |  | Streptococcus bovis group | 2 | ND | 7 | 3 |
| 2011_Ileo_MS_G11 | 1 | *Streptococcus* |  | Streptococcus bovis group | 2 | ND | 7 | 3 |
| 2011_Ileo_MS_H11 | 1 | *Streptococcus* |  | Streptococcus bovis group | 2 | ND | 7 | 3 |
| 2011_Ileo_MS_A12 | 1 | *Streptococcus* |  | Streptococcus bovis group | 2 | ND | 7 | 3 |
| 2011_Ileo_MS_B12 | 1 | *Streptococcus* |  | Streptococcus bovis group | 2 | ND | 7 | 3 |
| 2011_Ileo_MS_D12 | 1 |  | *Streptococcus* |  |  | ND | 7 | 3 |
| 2011_Ileo_MS_E12 | 1 | *Streptococcus* |  | Streptococcus bovis group | 2 | ND | 7 | 3 |
| 2011_Ileo_MS_F12 | 1 |  | *Streptococcus* |  |  | ND | 7 | 3 |
| 2011_Ileo_MS_G12 | 1 | *Streptococcus* |  | Streptococcus bovis group | 2 | ND | 7 | 3 |
| 2011_Ileo_MS_H12 | 1 | *Streptococcus* |  | Streptococcus bovis group | 2 | ND | 7 | 3 |
| 2011_Ileo_MS_A2 | 1 | *Streptococcus* |  | Streptococcus bovis group | 2 | ND | 7 | 3 |
| 2011_Ileo_MS_C2 | 1 | *Streptococcus* |  | Streptococcus bovis group | 2 | ND | 7 | 3 |
| 2011_Ileo_MS_F2 | 1 | *Streptococcus* |  | Streptococcus bovis group | 2 | ND | 7 | 3 |
| 2011_Ileo_MS_H2 | 1 | *Streptococcus* |  | Streptococcus bovis group | 2 | ND | 7 | 3 |
| 2011_Ileo_MS_B3 | 1 | *Streptococcus* |  | Streptococcus bovis group | 2 | ND | 7 | 3 |
| 2011_Ileo_MS_C3 | 1 | *Streptococcus* |  | Streptococcus bovis group | 2 | ND | 7 | 3 |
| 2011_Ileo_MS_G3 | 1 | *Streptococcus* |  | Streptococcus bovis group | 2 | ND | 7 | 3 |
| 2011_Ileo_MS_H3 | 1 | *Streptococcus* |  | Streptococcus bovis group | 2 | ND | 7 | 3 |
| 2011_Ileo_MS_C4 | 1 |  | *Streptococcus* |  |  | ND | 7 | 3 |
| 2011_Ileo_MS_D4 | 1 | *Streptococcus* |  | Streptococcus bovis group | 2 | ND | 7 | 3 |
| 2011_Ileo_MS_F4 | 1 | *Streptococcus* |  | Streptococcus bovis group | 2 | ND | 7 | 3 |
| 2011_Ileo_MS_A5 | 1 |  | *Streptococcus* |  |  | ND | 7 | 3 |
| 2011_Ileo_MS_B5 | 1 | *Streptococcus* |  | Streptococcus bovis group | 2 | ND | 7 | 3 |
| 2011_Ileo_MS_C5 | 1 |  | *Streptococcus* |  |  | ND | 7 | 3 |
| 2011_Ileo_MS_E5 | 1 | *Streptococcus* |  | Streptococcus bovis group | 2 | ND | 7 | 3 |
| 2011_Ileo_MS_F5 | 1 | *Streptococcus* |  | Streptococcus bovis group | 2 | ND | 7 | 3 |
| 2011_Ileo_MS_G5 | 1 | *Streptococcus* |  | Streptococcus bovis group | 2 | ND | 7 | 3 |
| 2011_Ileo_MS_B6 | 1 |  | *Streptococcus* |  |  | ND | 7 | 3 |
| 2011_Ileo_MS_C6 | 1 | *Streptococcus* |  | Streptococcus bovis group | 2 | ND | 7 | 3 |
| 2011_Ileo_MS_D6 | 1 | *Streptococcus* |  | Streptococcus bovis group | 2 | ND | 7 | 3 |
| 2011_Ileo_MS_G6 | 1 | *Streptococcus* |  | Streptococcus bovis group | 2 | ND | 7 | 3 |
| 2011_Ileo_MS_A7 | 1 | *Streptococcus* |  | Streptococcus bovis group | 2 | ND | 7 | 3 |
| 2011_Ileo_MS_B7 | 1 | *Streptococcus* |  | Streptococcus bovis group | 2 | ND | 7 | 3 |
| 2011_Ileo_MS_D7 | 1 | *Streptococcus* |  | Streptococcus bovis group | 2 | ND | 7 | 3 |
| 2011_Ileo_MS_E7 | 1 |  | *Streptococcus* |  |  | ND | 7 | 3 |
| 2011_Ileo_MS_F7 | 1 |  | *Streptococcus* |  |  | ND | 7 | 3 |
| 2011_Ileo_MS_G7 | 1 | *Streptococcus* |  | Streptococcus bovis group | 2 | ND | 7 | 3 |
| 2011_Ileo_MS_H7 | 1 | *Streptococcus* |  | Streptococcus bovis group | 2 | ND | 7 | 3 |
| 2011_Ileo_MS_A8 | 1 |  | *Streptococcus* |  |  | ND | 7 | 3 |
| 2011_Ileo_MS_B8 | 1 | *Streptococcus* |  | Streptococcus bovis group | 2 | ND | 7 | 3 |
| 2011_Ileo_MS_E8 | 1 | *Streptococcus* |  | Streptococcus bovis group | 2 | ND | 7 | 3 |
| 2011_Ileo_MS_F8 | 1 | *Streptococcus* |  | Streptococcus bovis group | 2 | ND | 7 | 3 |
| 2011_Ileo_MS_G8 | 1 | *Streptococcus* |  | Streptococcus bovis group | 2 | ND | 7 | 3 |
| 2011_Ileo_MS_H8 | 1 | *Streptococcus* |  | Streptococcus bovis group | 2 | ND | 7 | 3 |
| 2011_Ileo_MS_A9 | 1 | *Streptococcus* |  | Streptococcus bovis group | 2 | ND | 7 | 3 |
| 2011_Ileo_MS_B9 | 1 | *Streptococcus* |  | Streptococcus bovis group | 2 | ND | 7 | 3 |
| 2011_Ileo_MS_D9 | 1 | *Streptococcus* |  | Streptococcus bovis group | 2 | ND | 7 | 3 |
| 2011_Ileo_MS_E9 | 1 | *Streptococcus* |  | Streptococcus bovis group | 2 | ND | 7 | 3 |
| 2011_Ileo_MS_F9 | 1 |  | *Streptococcus* |  |  | ND | 7 | 3 |
| 2011_Ileo_MS_G9 | 1 | *Streptococcus* |  | Streptococcus bovis group | 2 | ND | 7 | 3 |
| 2010_Ileo_MS_Ie | 0 | *Streptococcus* |  | Streptococcus salivarius group | 3 | 2 | 4 | 4**** |
| 2010_Ileo_MS_XVc | 0 | *Streptococcus* |  | Streptococcus salivarius group | 3 | 4 | 2 | 5 |
| 2010_Ileo_MS_Ve | 0 | *Streptococcus* |  | Streptococcus salivarius group | 3 | 3 | 5 | 6 |
| 2010_Ileo_MS_VIb | 0 | *Streptococcus* |  | Streptococcus salivarius group | 3 | 3 | 5 | 6 |
| 2010_Ileo_MS_VIIf | 0 | *Streptococcus* |  | Streptococcus salivarius group | 3 | 3 | 5 | 6 |
| 2010_Ileo_MS_XIIc | 0 | *Streptococcus* |  | Streptococcus salivarius group | 3 | 3 | 5 | 6 |
| 2010_Ileo_MS_XIId | 0 | *Streptococcus* |  | Streptococcus salivarius group | 3 | 3 | 5 | 6 |
| 2010_Ileo_MS_XIVb | 0 | *Streptococcus* |  | Streptococcus salivarius group | 3 | 3 | 5 | 6 |
| 2010_Ileo_MS_XIVf | 0 | *Streptococcus* |  | Streptococcus salivarius group | 3 | 3 | 5 | 6 |
| 2010_Ileo_MS_XVa | 0 | *Streptococcus* |  | Streptococcus salivarius group | 3 | Inconclusive | 5 | 6 |
| 2010_Ileo_MS_Ia | 0 | *Streptococcus* |  | Streptococcus salivarius group | 3 | 1 | 4 | 7 |
| 2010_Ileo_MS_Ib | 0 | *Streptococcus* |  | Streptococcus salivarius group | 3 | 1 | 4 | 7 |
| 2010_Ileo_MS_Ic | 0 | *Streptococcus* |  | Streptococcus salivarius group | 3 | 1 | 4 | 7 |
| 2010_Ileo_MS_Id | 0 | *Streptococcus* |  | Streptococcus salivarius group | 3 | 1 | 4 | 7 |
| 2010_Ileo_MS_If | 0 | *Streptococcus* |  | Streptococcus salivarius group | 3 | 1 | 4 | 7 |
| 2010_Ileo_MS_IIa | 0 | *Streptococcus* |  | Streptococcus salivarius group | 3 | 1 | 4 | 7 |
| 2010_Ileo_MS_IIb | 0 | *Streptococcus* |  | Streptococcus salivarius group | 3 | 1 | 4 | 7 |
| 2010_Ileo_MS_IIc | 0 | *Streptococcus* |  | Streptococcus salivarius group | 3 | 1 | 4 | 7 |
| 2010_Ileo_MS_IId | 0 | *Streptococcus* |  | Streptococcus salivarius group | 3 | 1 | 4 | 7 |
| 2010_Ileo_MS_IIe | 0 | *Streptococcus* |  | Streptococcus salivarius group | 3 | 1 | 4 | 7 |
| 2010_Ileo_MS_IIf | 0 | *Streptococcus* |  | Streptococcus salivarius group | 3 | 1 | 4 | 7 |
| 2010_Ileo_MS_IIIa | 0 | *Streptococcus* |  | Streptococcus salivarius group | 3 | 1 | 4 | 7 |
| 2010_Ileo_MS_IIIb | 0 | *Streptococcus* |  | Streptococcus salivarius group | 3 | 1 | 4 | 7 |
| 2010_Ileo_MS_IIIc | 0 | *Streptococcus* |  | Streptococcus salivarius group | 3 | 1 | 4 | 7 |
| 2010_Ileo_MS_IIId | 0 | *Streptococcus* |  | Streptococcus salivarius group | 3 | 1 | 4 | 7 |
| 2010_Ileo_MS_IIIe | 0 | *Streptococcus* |  | Streptococcus salivarius group | 3 | 1 | 4 | 7 |
| 2010_Ileo_MS_IIIf | 0 | *Streptococcus* |  | Streptococcus salivarius group | 3 | 1 | 4 | 7 |
| 2010_Ileo_MS_VIIIa | 0 | *Streptococcus* |  | Streptococcus salivarius group | 3 | 1 | 4 | 7 |
| 2010_Ileo_MS_VIIIb | 0 | *Streptococcus* |  | Streptococcus salivarius group | 3 | 1 | 4 | 7 |
| 2010_Ileo_MS_VIIIc | 0 | *Streptococcus* |  | Streptococcus salivarius group | 3 | 1 | 4 | 7 |
| 2010_Ileo_MS_IXa | 0 | *Streptococcus* |  | Streptococcus salivarius group | 3 | 1 | 4 | 7 |
| 2010_Ileo_MS_IXb | 0 | *Streptococcus* |  | Streptococcus salivarius group | 3 | 1 | 4 | 7 |
| 2010_Ileo_MS_IXc | 0 | *Streptococcus* |  | Streptococcus salivarius group | 3 | 1 | 4 | 7 |
| 2010_Ileo_MS_IXd | 0 | *Streptococcus* |  | Streptococcus salivarius group | 3 | 1 | 4 | 7 |
| 2010_Ileo_MS_IXe | 0 | *Streptococcus* |  | Streptococcus salivarius group | 3 | 1 | 4 | 7 |
| 2010_Ileo_MS_IXf | 0 | *Streptococcus* |  | Streptococcus salivarius group | 3 | 1 | 4 | 7 |
| 2010_Ileo_MS_VIIId | 0 | *Streptococcus* |  | Streptococcus salivarius group | 3 | 1 | 4 | 7 |
| 2010_Ileo_MS_VIIIe | 0 | *Streptococcus* |  | Streptococcus salivarius group | 3 | 1 | 4 | 7 |
| 2010_Ileo_MS_VIIIf | 0 | *Streptococcus* |  | Streptococcus salivarius group | 3 | 1 | 4 | 7 |
| 2010_Ileo_MS_Xf | 0 | *Streptococcus* |  | Streptococcus salivarius group | 3 | 1 | 4 | 7 |
| 2010_Ileo_MS_XIa | 0 | *Streptococcus* |  | Streptococcus salivarius group | 3 | 1 | 4 | 7 |
| 2010_Ileo_MS_XIb | 0 | *Streptococcus* |  | Streptococcus salivarius group | 3 | 1 | 4 | 7 |
| 2010_Ileo_MS_XIc | 0 | *Streptococcus* |  | Streptococcus salivarius group | 3 | 1 | 4 | 7 |
| 2010_Ileo_MS_XId | 0 | *Streptococcus* |  | Streptococcus salivarius group | 3 | 1 | 4 | 7 |
| 2010_Ileo_MS_XIe | 0 | *Streptococcus* |  | Streptococcus salivarius group | 3 | 1 | 4 | 7 |
| 2010_Ileo_MS_XIf | 0 | *Streptococcus* |  | Streptococcus salivarius group | 3 | 1 | 4 | 7 |
| 2010_Ileo_MS_XIIIa | 0 | *Streptococcus* |  | Streptococcus salivarius group | 3 | 1 | 4 | 7 |
| 2010_Ileo_MS_XIIIb | 0 | *Streptococcus* |  | Streptococcus salivarius group | 3 | 1 | 4 | 7 |
| 2010_Ileo_MS_XIIIc | 0 | *Streptococcus* |  | Streptococcus salivarius group | 3 | 1 | 4 | 7 |
| 2010_Ileo_MS_XIIId | 0 | *Streptococcus* |  | Streptococcus salivarius group | 3 | 1 | 4 | 7 |
| 2010_Ileo_MS_XIIIe | 0 | *Streptococcus* |  | Streptococcus salivarius group | 3 | 1 | 4 | 7 |
| 2010_Ileo_MS_XIIIf | 0 | *Streptococcus* |  | Streptococcus salivarius group | 3 | 1 | 4 | 7 |
| 2010_Ileo_MS_XVIa | 0 | *Streptococcus* |  | Streptococcus salivarius group | 3 | 1 | 4 | 7 |
| 2010_Ileo_MS_XVIb | 0 | *Streptococcus* |  | Streptococcus salivarius group | 3 | 1 | 4 | 7 |
| 2010_Ileo_MS_XVIc | 0 | *Streptococcus* |  | Streptococcus salivarius group | 3 | 1 | 4 | 7 |
| 2010_Ileo_MS_XVId | 0 | *Streptococcus* |  | Streptococcus salivarius group | 3 | 1 | 4 | 7 |
| 2010_Ileo_MS_XVIe | 0 | *Streptococcus* |  | Streptococcus salivarius group | 3 | 1 | 4 | 7 |
| 2010_Ileo_MS_XVIf | 0 | *Streptococcus* |  | Streptococcus salivarius group | 3 | 1 | 4 | 7 |
| 2010_Ileo_MS_XVIIa | 0 | *Streptococcus* |  | Streptococcus salivarius group | 3 | 1 | 4 | 7 |
| 2010_Ileo_MS_XVIIb | 0 | *Streptococcus* |  | Streptococcus salivarius group | 3 | 1 | 4 | 7 |
| 2010_Ileo_MS_XVIIc | 0 | *Streptococcus* |  | Streptococcus salivarius group | 3 | 1 | 4 | 7 |
| 2010_Ileo_MS_XVIId | 0 | *Streptococcus* |  | Streptococcus salivarius group | 3 | 1 | 4 | 7 |
| 2010_Ileo_MS_XVIIe | 0 | *Streptococcus* |  | Streptococcus salivarius group | 3 | 1 | 4 | 7 |
| 2010_Ileo_MS_XVIIf | 0 | *Streptococcus* |  | Streptococcus salivarius group | 3 | 1 | 4 | 7 |
| 2010_Ileo_MS_XIXa | 0 | *Streptococcus* |  | Streptococcus salivarius group | 3 | 1 | 4 | 7 |
| 2010_Ileo_MS_XIXb | 0 | *Streptococcus* |  | Streptococcus salivarius group | 3 | 1 | 4 | 7 |
| 2010_Ileo_MS_XIXc | 0 | *Streptococcus* |  | Streptococcus salivarius group | 3 | Inconclusive | 4 | 7 |
| 2010_Ileo_MS_XIXd | 0 | *Streptococcus* |  | Streptococcus salivarius group | 3 | Inconclusive | 4 | 7 |
| 2010_Ileo_MS_XIXe | 0 | *Streptococcus* |  | Streptococcus salivarius group | 3 | Inconclusive | 4 | 7 |
| 2010_Ileo_MS_XIXf | 0 | *Streptococcus* |  | Streptococcus salivarius group | 3 | 1 | 4 | 7 |
| 2010_Ileo_MS_XXa | 0 |  | *Streptococcus* |  |  | Inconclusive | 4 | 7 |
| 2010_Ileo_MS_XXb | 0 | *Streptococcus* |  | Streptococcus salivarius group | 3 | 1 | 4 | 7 |
| 2010_Ileo_MS_XXc | 0 | *Streptococcus* |  | Streptococcus salivarius group | 3 | 1 | 4 | 7 |
| 2010_Ileo_MS_XXd | 0 | *Streptococcus* |  | Streptococcus salivarius group | 3 | 1 | 4 | 7 |
| 2010_Ileo_MS_XXe | 0 | *Streptococcus* |  | Streptococcus salivarius group | 3 | 1 | 4 | 7 |
| 2010_Ileo_MS_XXf | 0 | *Streptococcus* |  | Streptococcus salivarius group | 3 | 1 | 4 | 7 |
| 2010_Ileo_MS_VIId | 0 | *Enterococcus* |  | Enterococcus avium group | 5b** | 10 | 16 | 8 |
| 2011_Ileo_MS_C9 | 1 | *Enterococcus* |  | Enterococcus faecium group | 5c** | ND | 15 | 9 |
| 2010_Ileo_MS_XIIe | 0 | *Enterococcus* |  | Enterococcus gallinarum group | 5a** | 7 | 14 | 10 |
| 2010_Ileo_MS_XIVa | 0 | *Enterococcus* |  | Enterococcus gallinarum group | 5a** | 7 | 14 | 10 |
| 2010_Ileo_MS_XVIIIc | 0 | *Enterococcus* |  | Enterococcus gallinarum group | 5a** | 7 | 14 | 10 |
| 2010_Ileo_MS_XVIIIe | 0 | *Enterococcus* |  | Enterococcus gallinarum group | 5a** | 7 | 14 | 10 |
| 2011_Ileo_MS_B4 | 1 | *Enterococcus* |  | Enterococcus gallinarum group | 5a** | ND | 14 | 10 |
| 2011_Ileo_MS_C12 | 1 | *Enterococcus* |  | Enterococcus avium group | 5b** | ND | 13 | 11 |
| 2011_Ileo_MS_D3 | 1 | *Enterococcus* |  | Enterococcus avium group | 5b** | ND | 13 | 11 |
| 2011_Ileo_MS_F3 | 1 | *Enterococcus* |  | Enterococcus avium group | 5b** | ND | 13 | 11 |
| 2011_Ileo_MS_H4 | 1 | *Enterococcus* |  | Enterococcus avium group | 5b** | ND | 13 | 11 |
| 2011_Ileo_MS_H5 | 1 | *Enterococcus* |  | Enterococcus avium group | 5b** | ND | 13 | 11 |
| 2011_Ileo_MS_H6 | 1 | *Enterococcus* |  | Enterococcus avium group | 5b** | ND | 13 | 11 |
| 2011_Ileo_MS_A1 | 1 |  | *Enterococcus* |  |  | ND | 11 | 12 |
| 2011_Ileo_MS_E1 | 1 | *Enterococcus* |  | Enterococcus avium group | 5b** | ND | 11 | 12 |
| 2011_Ileo_MS_G1 | 1 | *Enterococcus* |  | Enterococcus avium group | 5b** | ND | 11 | 12 |
| 2011_Ileo_MS_B2 | 1 | *Enterococcus* |  | Enterococcus avium group | 5b** | ND | 11 | 12 |
| 2011_Ileo_MS_G2 | 1 | *Enterococcus* |  | Enterococcus avium group | 5b** | ND | 11 | 12 |
| 2011_Ileo_MS_A4 | 1 | *Enterococcus* |  | Enterococcus avium group | 5b** | ND | 11 | 12 |
| 2011_Ileo_MS_E4 | 1 | *Enterococcus* |  | Enterococcus avium group | 5b** | ND | 11 | 12 |
| 2011_Ileo_MS_D5 | 1 | *Enterococcus* |  | Enterococcus avium group | 5b** | ND | 11 | 12 |
| 2011_Ileo_MS_C7 | 1 | *Enterococcus* |  | Enterococcus avium group | 5b** | ND | 11 | 12 |
| 2010_Ileo_MS_XVd | 0 | *Enterococcus* |  | Enterococcus avium group | 5b** | Inconclusive | 11 | 12 |
| 2011_Ileo_MS_B1 | 1 |  | *Enterococcus* |  |  | ND | 12 | 13 |
| 2011_Ileo_MS_C1 | 1 |  | *Enterococcus* |  |  | ND | 12 | 13 |
| 2011_Ileo_MS_C11 | 1 |  | *Enterococcus* |  |  | ND | 12 | 13 |
| 2011_Ileo_MS_A3 | 1 |  | *Enterococcus* |  |  | ND | 12 | 13 |
| 2011_Ileo_MS_E3 | 1 |  | *Enterococcus* |  |  | ND | 12 | 13 |
| 2011_Ileo_MS_A6 | 1 |  | *Enterococcus* |  |  | ND | 12 | 13 |
| 2011_Ileo_MS_F6 | 1 |  | *Enterococcus* |  |  | ND | 12 | 13 |
| 2011_Ileo_MS_D8 | 1 |  | *Enterococcus* |  |  | ND | 12 | 13 |
| 2011_Ileo_MS_H9 | 1 |  | *Enterococcus* |  |  | ND | 12 | 13 |
| 2010_Ileo_MS_Vb | 0 | *Enterococcus* |  | Enterococcus faecium group | 5c** | 12 | 12 | 13 |
| 2010_Ileo_MS_VIa | 0 |  | *Enterococcus* |  |  | 12 | 12 | 13 |
| 2010_Ileo_MS_IVa | 0 | *Enterococcus* |  | Enterococcus faecalis | 6 | 11 | 17 | 14 |
| 2010_Ileo_MS_IVb | 0 | *Enterococcus* |  | Enterococcus faecalis | 6 | 11 | 17 | 14 |
| 2010_Ileo_MS_IVc | 0 | *Enterococcus* |  | Enterococcus faecalis | 6 | 11 | 17 | 14 |
| 2010_Ileo_MS_IVd | 0 | *Enterococcus* |  | Enterococcus faecalis | 6 | 11 | 17 | 14 |
| 2010_Ileo_MS_IVe | 0 | *Enterococcus* |  | Enterococcus faecalis | 6 | 11 | 17 | 14 |
| 2010_Ileo_MS_IVf | 0 | *Enterococcus* |  | Enterococcus faecalis | 6 | 11 | 17 | 14 |
| 2010_Ileo_MS_Xa | 0 | *Enterococcus* |  | Enterococcus faecalis | 6 | 11 | 17 | 14 |
| 2010_Ileo_MS_Xb | 0 | *Enterococcus* |  | Enterococcus faecalis | 6 | 11 | 17 | 14 |
| 2010_Ileo_MS_Xc | 0 | *Enterococcus* |  | Enterococcus faecalis | 6 | 11 | 17 | 14 |
| 2010_Ileo_MS_Xd | 0 | *Enterococcus* |  | Enterococcus faecalis | 6 | 11 | 17 | 14 |
| 2010_Ileo_MS_Xe | 0 | *Enterococcus* |  | Enterococcus faecalis | 6 | Inconclusive | 17 | 14 |
| 2010_Ileo_MS_XIIa | 0 | *Enterococcus* |  | Enterococcus faecalis | 6 | 11 | 17 | 14 |
| 2010_Ileo_MS_XIIb | 0 | *Enterococcus* |  | Enterococcus faecalis | 6 | 11 | 17 | 14 |
| 2010_Ileo_MS_XIIf | 0 | *Enterococcus* |  | Enterococcus faecalis | 6 | 11 | 17 | 14 |
| 2010_Ileo_MS_XIVc | 0 | *Enterococcus* |  | Enterococcus faecalis | 6 | 11 | 17 | 14 |
| 2010_Ileo_MS_XIVd | 0 | *Enterococcus* |  | Enterococcus faecalis | 6 | 11 | 17 | 14 |
| 2010_Ileo_MS_XIVe | 0 | *Enterococcus* |  | Enterococcus faecalis | 6 | 11 | 17 | 14 |
| 2010_Ileo_MS_XVIIIb | 0 | *Enterococcus* |  | Enterococcus faecalis | 6 | 11 | 17 | 14 |
| 2010_Ileo_MS_XVIIId | 0 | *Enterococcus* |  | Enterococcus faecalis | 6 | 11 | 17 | 14 |
| 2010_Ileo_MS_XVIIIf | 0 | *Enterococcus* |  | Enterococcus faecalis | 6 | 11 | 17 | 14 |
| 2011_Ileo_MS_C8 | 1 | *Enterococcus* |  | Enterococcus faecalis | 6 | ND | 17 | 14 |
| 2011_Ileo_VSA_C1 | 1 | *Lactobacillus* |  | Lactobacilus fermentum | 8 | ND | Inconclusive | Inconclusive |
| 2011_Ileo_VSA_D1 | 1 | *Veillonella* |  | Veillonella parvula | 4 | ND | Inconclusive | Inconclusive |
| 2011_Ileo_VSA_E1 | 1 | *Veillonella* |  | Veillonella parvula | 4 | ND | Inconclusive | Inconclusive |
| 2011_Ileo_VSA_D2 | 1 | *Lactobacillus* |  | Lactobacilus fermentum | 8 | ND | Inconclusive | Inconclusive |
| 2011_Ileo_VSA_E2 | 1 | *Lactobacillus* |  | Lactobacilus fermentum | 8 | ND | Inconclusive | Inconclusive |
| 2011_Ileo_VSA_F2 | 1 | *Veillonella* |  | Veillonella parvula | 4 | ND | Inconclusive | Inconclusive |
| 2011_Ileo_VSA_F3 | 1 | *Veillonella* |  | Veillonella parvula | 4 | ND | Inconclusive | Inconclusive |
| 2011_Ileo_VSA_E4 | 1 | *Veillonella* |  | Veillonella parvula | 4 | ND | Inconclusive | Inconclusive |
| 2011_Ileo_VSA_A5 | 1 | *Veillonella* |  | Veillonella parvula | 4 | ND | Inconclusive | Inconclusive |
| 2011_Ileo_VSA_B5 | 1 | *Veillonella* |  | Veillonella parvula | 4 | ND | Inconclusive | Inconclusive |
| 2011_Ileo_VSA_C5 | 1 | *Lactobacillus* |  | Lactobacilus fermentum | 8 | ND | Inconclusive | Inconclusive |
| 2011_Ileo_VSA_E5 | 1 | *Veillonella* |  | Veillonella parvula | 4 | ND | Inconclusive | Inconclusive |
| 2011_Ileo_VSA_A6 | 1 | *Veillonella* |  | Veillonella parvula | 4 | ND | Inconclusive | Inconclusive |
| 2011_Ileo_VSA_C6 | 1 | *Veillonella* |  | Veillonella parvula | 4 | ND | Inconclusive | Inconclusive |
| 2011_Ileo_VSA_D6 | 1 | *Bacteroides* |  | Bacteroides fragilis | 7 | ND | Inconclusive | Inconclusive |
| 2011_Ileo_VSA_E6 | 1 | *Veillonella* |  | Veillonella parvula | 4 | ND | Inconclusive | Inconclusive |
| 2011_Ileo_VSA_D7 | 1 | *Bacteroides* |  | Bacteroides fragilis | 7 | ND | Inconclusive | Inconclusive |
| 2011_Ileo_VSA_G7 | 1 | *Veillonella* |  | Veillonella parvula | 4 | ND | Inconclusive | Inconclusive |
| 2011_Ileo_VSA_D8 | 1 | *Bacteroides* |  | Bacteroides fragilis | 7 | ND | Inconclusive | Inconclusive |
| 2011_Ileo_VSA_F8 | 1 | *Veillonella* |  | Veillonella parvula | 4 | ND | Inconclusive | Inconclusive |
| 2011_Ileo_VSA_C9 | 1 | *Bacteroides* |  | Bacteroides fragilis | 7 | ND | Inconclusive | Inconclusive |
| 2011_Ileo_VSA_G9 | 1 | *Veillonella* |  | Veillonella parvula | 4 | ND | Inconclusive | Inconclusive |
| 2011_Ileo_VSA_D11 | 1 | *Bacteroides* |  | Bacteroides fragilis | 7 | ND | Inconclusive | Inconclusive |
| 2011_Ileo_VSA_C12 | 1 | *Veillonella* |  | Veillonella parvula | 4 | ND | Inconclusive | Inconclusive |
| 2011_Ileo_VSA_E12 | 1 | *Veillonella* |  | Veillonella parvula | 4 | ND | Inconclusive | Inconclusive |
| 2010_Ileo_VSA_Ia | 0 | *Enterococcus* |  | Enterococcus gallinarum group | 5a** | Inconclusive | Inconclusive | Inconclusive |
| 2010_Ileo_VSA_Ib | 0 | *Veillonella* |  | Veillonella parvula | 4 | Inconclusive | Inconclusive | Inconclusive |
| 2010_Ileo_VSA_Ic | 0 | *Enterococcus* |  | Enterococcus gallinarum group | 5a** | Inconclusive | Inconclusive | Inconclusive |
| 2010_Ileo_VSA_Id | 0 | *Veillonella* |  | Veillonella parvula | 4 | Inconclusive | Inconclusive | Inconclusive |
| 2010_Ileo_VSA_Ie | 0 | *Enterococcus* |  | Enterococcus gallinarum group | 5a** | 8 | Inconclusive | Inconclusive |
| 2010_Ileo_VSA_IIa | 0 | *Enterococcus* |  | Enterococcus gallinarum group | 5a** | 8 | Inconclusive | Inconclusive |
| 2010_Ileo_VSA_IIe | 0 | *Enterococcus* |  | Enterococcus gallinarum group | 5a** | 8 | Inconclusive | Inconclusive |
| 2010_Ileo_VSA_IIIb | 0 | *Veillonella* |  | Veillonella parvula | 4 | Inconclusive | Inconclusive | Inconclusive |
| 2010_Ileo_VSA_IIIc | 0 | *Veillonella* |  | Veillonella parvula | 4 | Inconclusive | Inconclusive | Inconclusive |
| 2010_Ileo_VSA_IIId | 0 | *Veillonella* |  | Veillonella parvula | 4 | Inconclusive | Inconclusive | Inconclusive |
| 2010_Ileo_VSA_IIIe | 0 | *Veillonella* |  | Veillonella parvula | 4 | Inconclusive | Inconclusive | Inconclusive |
| 2010_Ileo_VSA_IIIf | 0 | *Veillonella* |  | Veillonella parvula | 4 | Inconclusive | Inconclusive | Inconclusive |
| 2010_Ileo_VSA_IVa | 0 | *Enterococcus* |  | Enterococcus gallinarum group | 5a** | Inconclusive | Inconclusive | Inconclusive |
| 2010_Ileo_VSA_IVb | 0 | *Enterococcus* |  | Enterococcus gallinarum group | 5a** | Inconclusive | Inconclusive | Inconclusive |
| 2010_Ileo_VSA_IVc | 0 | *Veillonella* |  | Veillonella parvula | 4 | Inconclusive | Inconclusive | Inconclusive |
| 2010_Ileo_VSA_IVf | 0 | *Enterococcus* |  | Enterococcus gallinarum group | 5a** | Inconclusive | Inconclusive | Inconclusive |
| 2010_Ileo_VSA_Vb | 0 | *Veillonella* |  | Veillonella parvula | 4 | Inconclusive | Inconclusive | Inconclusive |
| 2010_Ileo_VSA_Vc | 0 | *Veillonella* |  | Veillonella parvula | 4 | Inconclusive | Inconclusive | Inconclusive |
| 2010_Ileo_VSA_Vd | 0 | *Veillonella* |  | Veillonella parvula | 4 | Inconclusive | Inconclusive | Inconclusive |
| 2010_Ileo_VSA_Ve | 0 | *Enterococcus* |  | Enterococcus gallinarum group | 5a** | Inconclusive | Inconclusive | Inconclusive |
| 2010_Ileo_VSA_VIa | 0 | *Enterococcus* |  | Enterococcus gallinarum group | 5a** | Inconclusive | Inconclusive | Inconclusive |
| 2010_Ileo_VSA_VIb | 0 | *Veillonella* |  | Veillonella parvula | 4 | Inconclusive | Inconclusive | Inconclusive |
| 2010_Ileo_VSA_VIc | 0 | *Veillonella* |  | Veillonella parvula | 4 | Inconclusive | Inconclusive | Inconclusive |
| 2010_Ileo_VSA_VId | 0 | *Veillonella* |  | Veillonella parvula | 4 | Inconclusive | Inconclusive | Inconclusive |
| 2010_Ileo_VSA_VIe | 0 | *Veillonella* |  | Veillonella parvula | 4 | Inconclusive | Inconclusive | Inconclusive |
| 2010_Ileo_VSA_VIf | 0 | *Veillonella* |  | Veillonella parvula | 4 | Inconclusive | Inconclusive | Inconclusive |
| 2010_Ileo_VSA_VIIa | 0 | *Veillonella* |  | Veillonella parvula | 4 | Inconclusive | Inconclusive | Inconclusive |
| 2010_Ileo_VSA_VIIb | 0 | *Enterococcus* |  | Enterococcus gallinarum group | 5a** | Inconclusive | Inconclusive | Inconclusive |
| 2010_Ileo_VSA_VIIc | 0 | *Veillonella* |  | Veillonella parvula | 4 | Inconclusive | Inconclusive | Inconclusive |
| 2010_Ileo_VSA_VIId | 0 | *Veillonella* |  | Veillonella parvula | 4 | Inconclusive | Inconclusive | Inconclusive |
| 2010_Ileo_VSA_VIIe | 0 | *Veillonella* |  | Veillonella parvula | 4 | Inconclusive | Inconclusive | Inconclusive |
| 2010_Ileo_VSA_VIIf | 0 | *Veillonella* |  | Veillonella parvula | 4 | Inconclusive | Inconclusive | Inconclusive |

*1: phylotype grouping based on a threshold of 97% sequence identity

**: phylotype grouping when the threshold fowas raised from 97% to 99% sequence identity

***: Blanks represent isolate for which no near full-length and/or partial 16S rRNA gene sequences were available

****: AFLP analysis unlike Rep-PCR genomic fingerprinting identified a single *Streptococcus* isolate as a separate genomic lineage

ND: Not determined
