# Supplementary material for: Diversity of human small intestinalStreptococcusandVeillonellapopulations
Source: Oxford University Press journal article supplement (doi:10.1111/1574-6941.12127), 2013-04-05
Supplement: fem12127-sup-0006-DataS1.docx [file fem12127-sup-0006-DataS1.docx]

**Supplementary Material and methods**

*Veillonella* and *Streptococcus* spp. included in the MALDITOF MS database:

*Veillonella atypica*  2 strain(s)

*Veillonella caviae*  1 strain(s)

*Veillonella criceti*  1 strain(s)

*Veillonella denticariosi*  2 strain(s)

*Veillonella dispar*  1 strain(s)

*Veillonella montpellierensis*  1 strain(s)

*Veillonella parvula*  2 strain(s)

*Veillonella ratti*  1 strain(s)

*Veillonella rogosae*  1 strain(s)

*Veillonella sp.*  1 strain(s)

*Streptococcus acidominimus*  1 strain(s)

*Streptococcus agalactiae*  9 strain(s)

*Streptococcus alactolyticus*  1 strain(s)

*Streptococcus anginosus*  2 strain(s)

*Streptococcus australis*  1 strain(s)

*Streptococcus caballi*  1 strain(s)

*Streptococcus canis*  2 strain(s)

*Streptococcus constellatus*  2 strain(s)

*Streptococcus criceti*  1 strain(s)

*Streptococcus cristatus*  2 strain(s)

*Streptococcus dentirousetti*  1 strain(s)

*Streptococcus devriesei*  2 strain(s)

*Streptococcus didelphis*  1 strain(s)

*Streptococcus downei*  1 strain(s)

*Streptococcus dysgalactiae*  6 strain(s)

*Streptococcus entericus*  1 strain(s)

*Streptococcus equi*  5 strain(s)

*Streptococcus equinus*  2 strain(s)

*Streptococcus ferus*  1 strain(s)

*Streptococcus gallinaceus*  1 strain(s)

*Streptococcus gallolyticus*  8 strain(s)

*Streptococcus gordonii*  3 strain(s)

*Streptococcus halichoeri*  1 strain(s)

*Streptococcus hyointestinalis*  1 strain(s)

*Streptococcus hyovaginalis*  2 strain(s)

*Streptococcus infantarius*  1 strain(s)

*Streptococcus infantis*  1 strain(s)

*Streptococcus intermedius*  1 strain(s)

*Streptococcus lutetiensis*  1 strain(s)

*Streptococcus macacae*  1 strain(s)

*Streptococcus marimammalium* 1 strain(s)

*Streptococcus massiliensis*  1 strain(s)

*Streptococcus minor*  3 strain(s)

*Streptococcus mitis*  1 strain(s)

*Streptococcus mutans*  1 strain(s)

*Streptococcus oralis*  4 strain(s)

*Streptococcus orisratti* 1 strain(s)

*Streptococcus orisuis*  1 strain(s)

*Streptococcus ovis*  1 strain(s)

*Streptococcus parasanguinis*  2 strain(s)

*Streptococcus parauberis*  2 strain(s)

*Streptococcus peroris*  1 strain(s)

*Streptococcus phocae*  2 strain(s)

*Streptococcus pleomorphus*  1 strain(s)

*Streptococcus pluranimalium*  1 strain(s)

*Streptococcus pneumoniae*  9 strain(s)

*Streptococcus porcinus*  1 strain(s)

*Streptococcus pseudopneumoniae* 1 strain(s)

*Streptococcus pseudoporcinus* 1 strain(s)

*Streptococcus pyogenes*  8 strain(s)

*Streptococcus ratti*  1 strain(s)

*Streptococcus salivarius*  4 strain(s)

*Streptococcus sanguinis*  4 strain(s)

*Streptococcus sinensis*  1 strain(s)

*Streptococcus sobrinus*  2 strain(s)

*Streptococcus suis*  3 strain(s)

*Streptococcus thermophilus*  6 strain(s)

*Streptococcus thoraltensis*  2 strain(s)

*Streptococcus uberis*  1 strain(s)

*Streptococcus urinalis*  1 strain(s)

*Streptococcus vestibularis*  1 strain(s)

*Streptococcus sp.*  2 strain(s)
